# Supplementary material
Source: publisher figshare collection journal article supplement (https://acs.figshare.com/ndownloader/files/4537066)
Supplement: Supplementary file 1 [file 4537066]

## **Supplementary Information**

### **Two Component Thermoreversible Hydrogels of Melamine and Gallic Acid**

Abhijit Saha, Bappaditya Roy, Ashesh Garai and Arun K. Nandi<sup>\*</sup>

Polymer Science Unit, Indian Association for the Cultivation of Science, Jadavpur,

Kolkata- 700 032, India.

**Supplementary Figure 1:** DSC thermograms of hydrogel of (a) GM11 (2 % w/v), (b) GM31 (5 % w/v) and (b) GM13 (5 % w/v) for heating at the rate of 10 °/min and on cooling at 5 °/ min. for (i) first heating, (ii) cooling and (iii) second heating (after keeping at 5 °C for 10 mins).

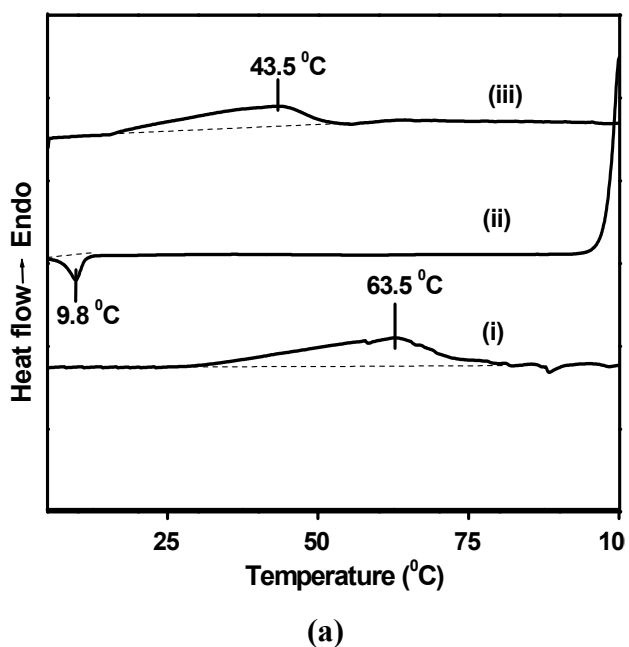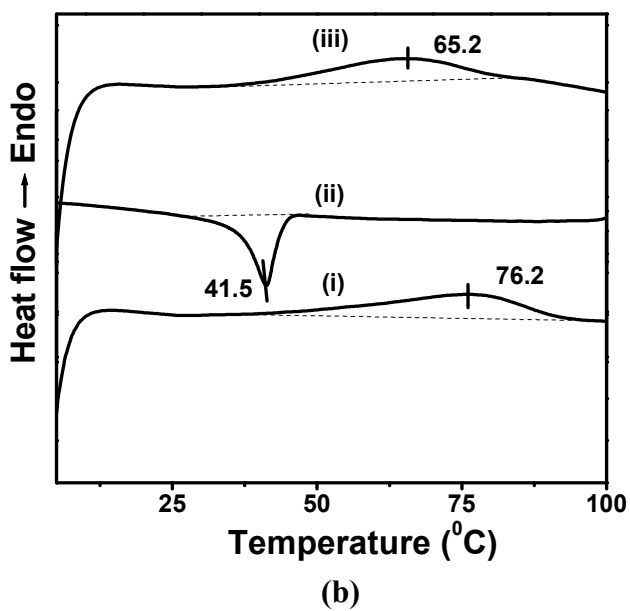

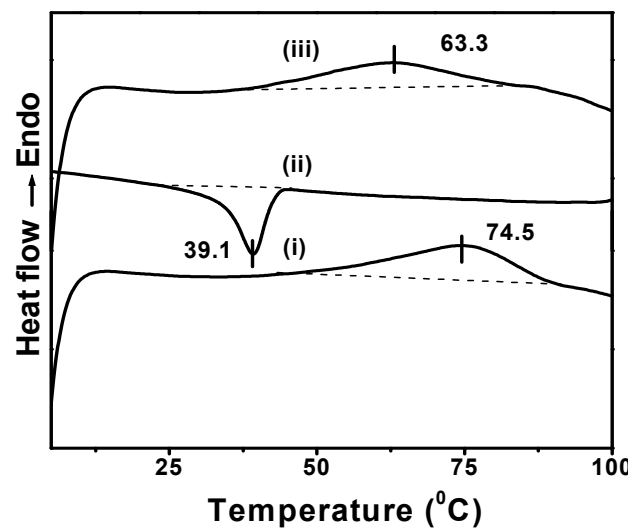

(c)

**Supplementary Figure 2:** FTIR spectra of xerogels of 2 % (w/v) hydrogels of GM13, GM11, GM31, pure G and M.

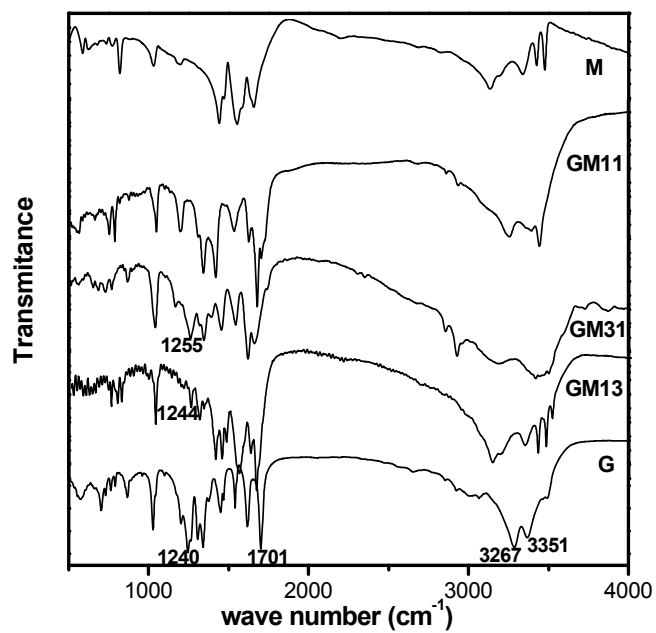

**Supplementary Figure 3:** Comparison of  $^1\text{H}$  NMR spectra near  $\delta$  7 ppm for pure G, M, 2 % (w/v) GM11 sol and GM11 gel (conc. of G is same for all samples) in  $\text{D}_2\text{O}$ .

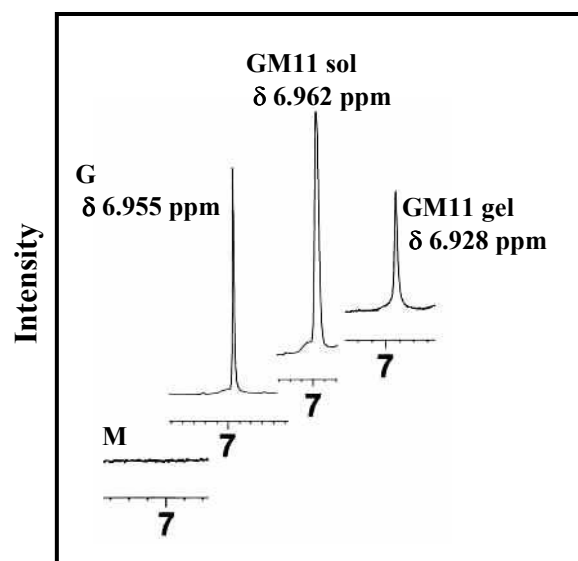

**Supplementary Figure 4:** Normalized absorption spectra of 0.1 % w/v pure G in water, GM13, GM11 and GM31 sols [Inset: absorption spectra of 0.1 % w/v G in water and that for GM11 1% at indicated times after sol preparation] at 25 °C.

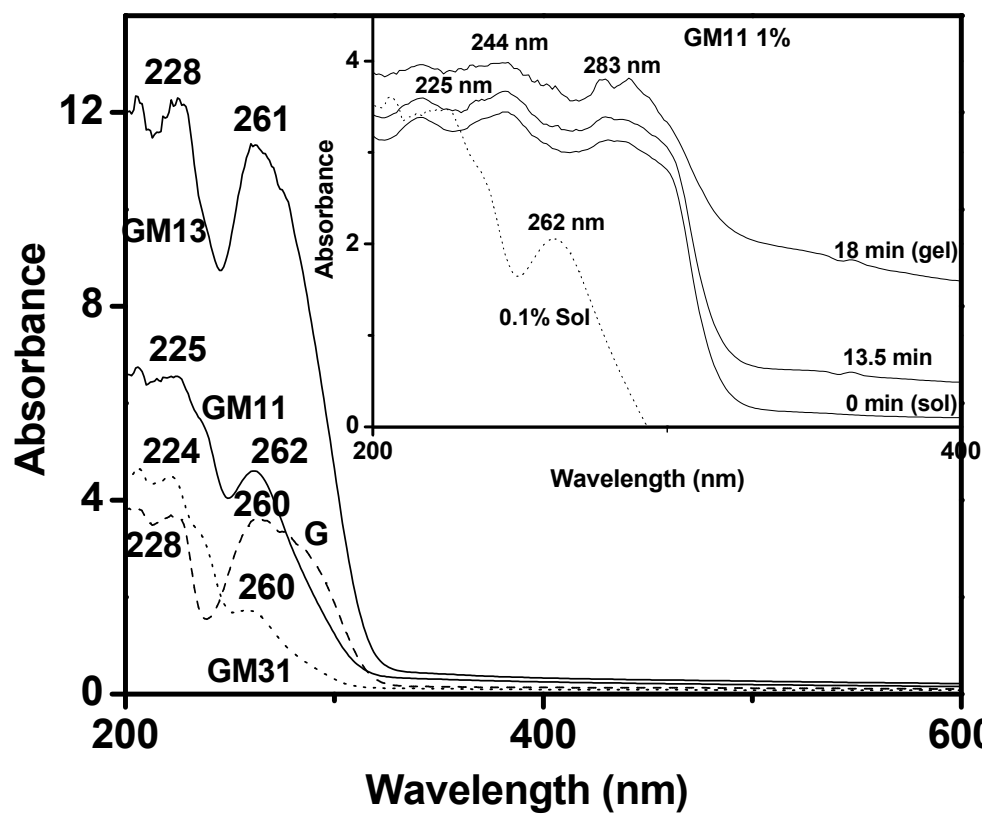

**Supplementary Figure 5:** Photoluminescence spectra of 2 % (w/v) sol and gel for (a) GM11 & pure G (conc. of G is same for all samples), (b) GM31, (c) GM13 and (d) normalized PL-spectra of GM11, GM31 and GM13 from 2% (w/v) hydrogels [excitation wavelength 256nm].

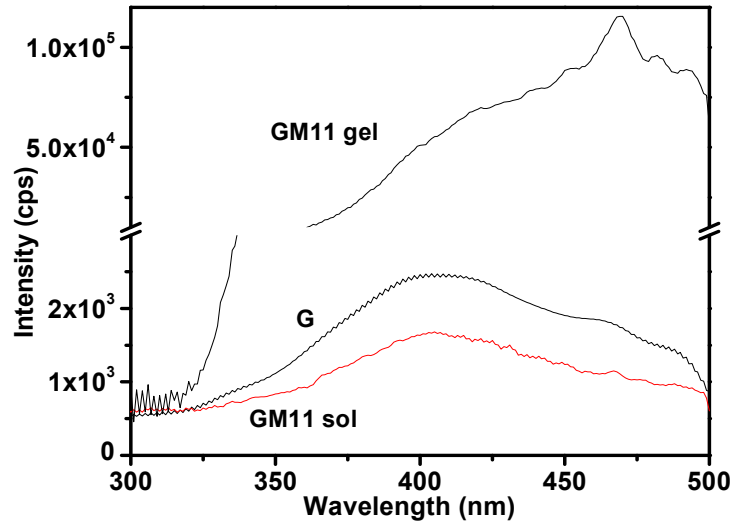

(a)

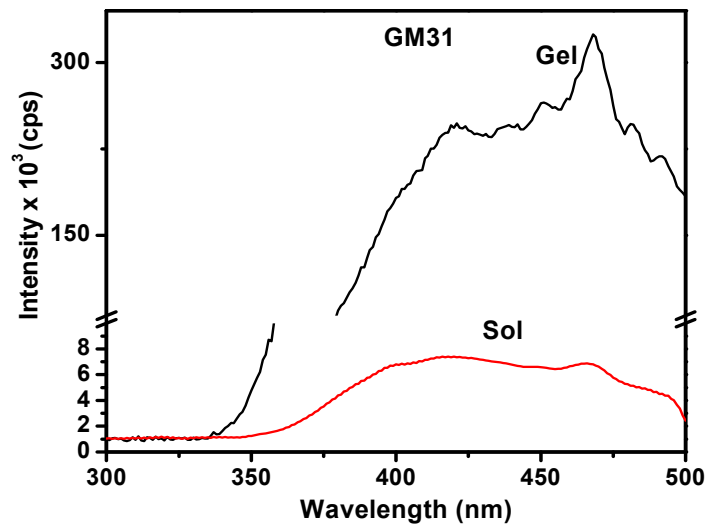

(b)

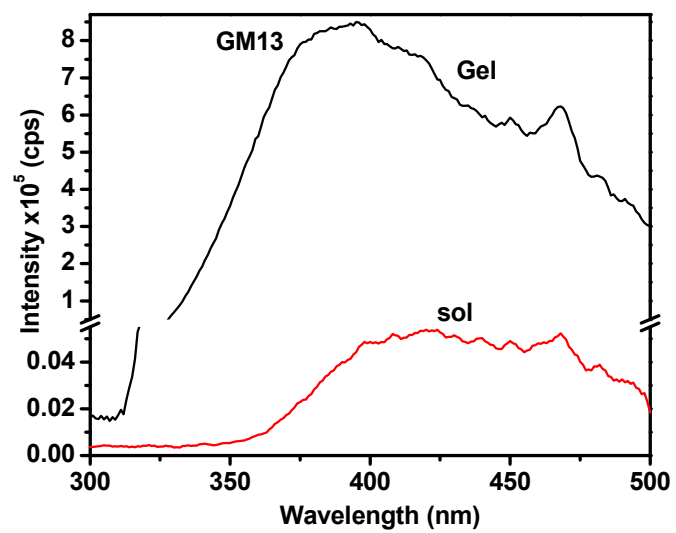

(c)

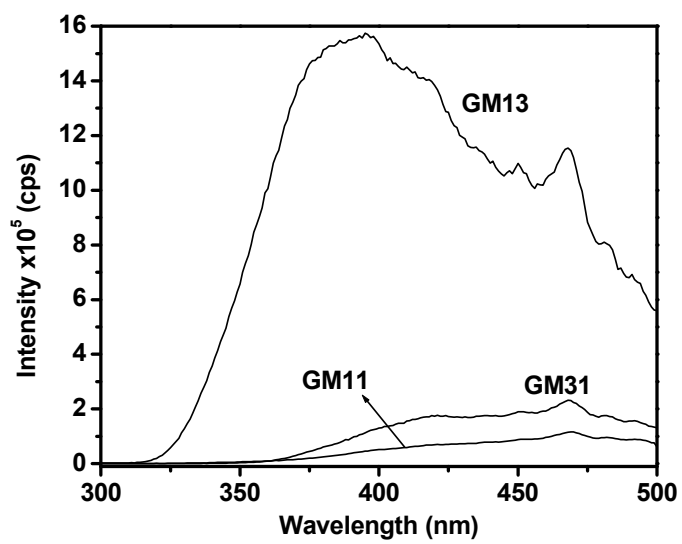

(d)
